# Supplementary material for: Surface-initiated polymerization for the preparation of magnetic polymer composites
Source: Royal Society of Chemistry journal article supplement (doi:10.1039/c9py01744e), 2020-01-01
Supplement: c9py01744e1.pdf [file c9py01744e1.pdf]

## Supporting Information

### Surface-initiated polymerization for the preparation of magnetic polymer composites (with tunable diameter)

Yang Wang, Lin Shi, Yajin Jin, Si Sun, Pengcheng Gao, Yingying Wei, Zhifei Wang,  
Yong Jiang\*

*School of Chemistry and Chemical Engineering, Jiangsu Province Hi-Tech Key Laboratory for  
Biomedical Research, Southeast University, Nanjing 211189, P.R. China*

*E-mail: yj@seu.edu.cn*

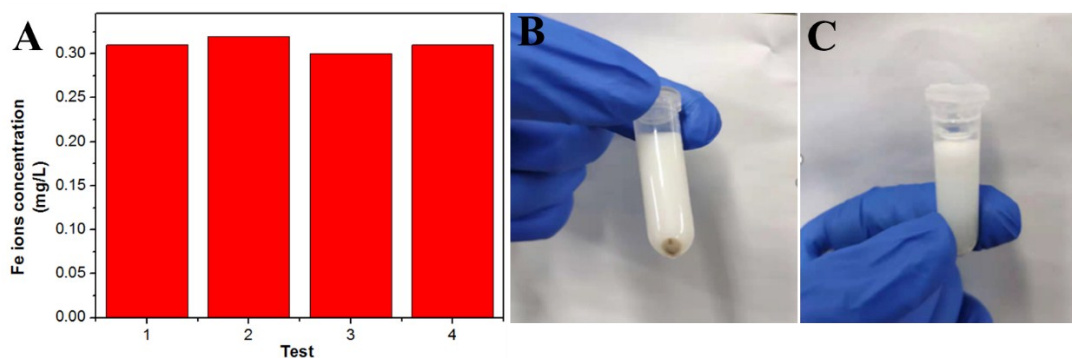

Fig. S1. (A) ICP-MS testing of Fe ions concentration after acetic acid was added in the microemulsion; (B) The picture of  $\text{Fe}_3\text{O}_4@PS$  composites; (C) Styrene was not polymerized at the same concentration of  $\text{Fe}^{2+}/\text{Fe}^{3+}$  and  $\text{H}_2\text{O}_2$  without  $\text{Fe}_3\text{O}_4$  nanoparticles and the solution was divided into two layers.

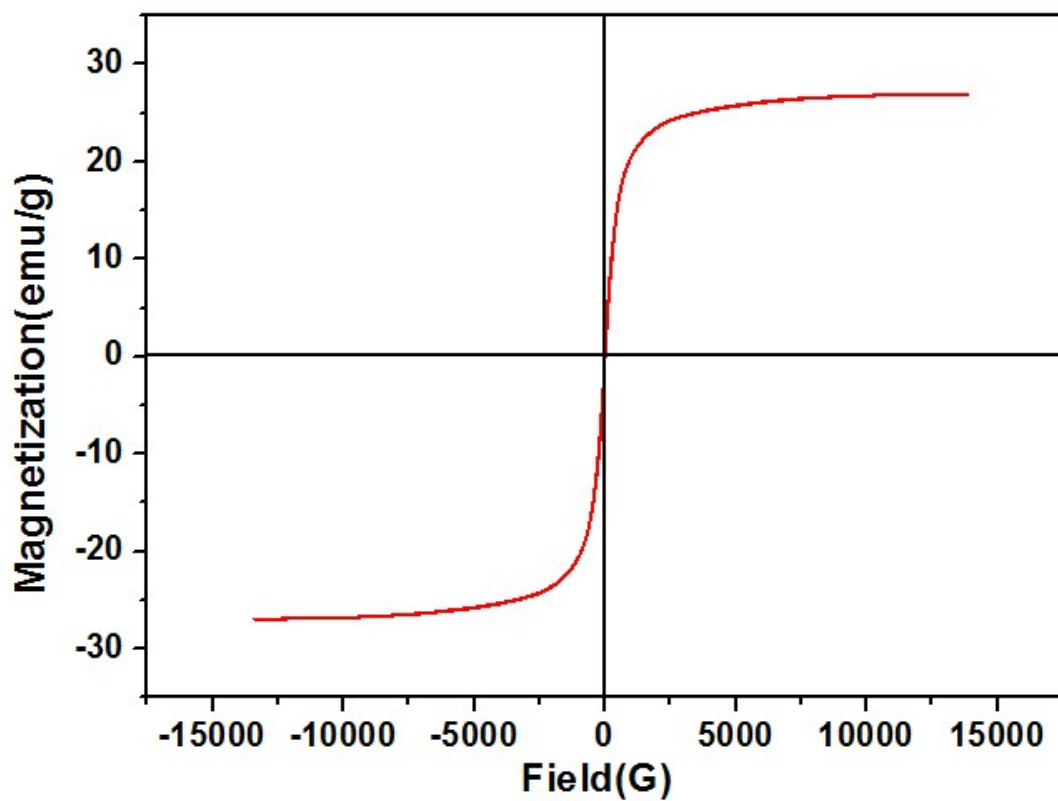

Fig. S2. Magnetization curves of  $\text{Fe}_3\text{O}_4@PS$  microspheres. The concentration of  $\text{Fe}_3\text{O}_4$  nanoparticles is 300 mg/L (Fig. 3D).

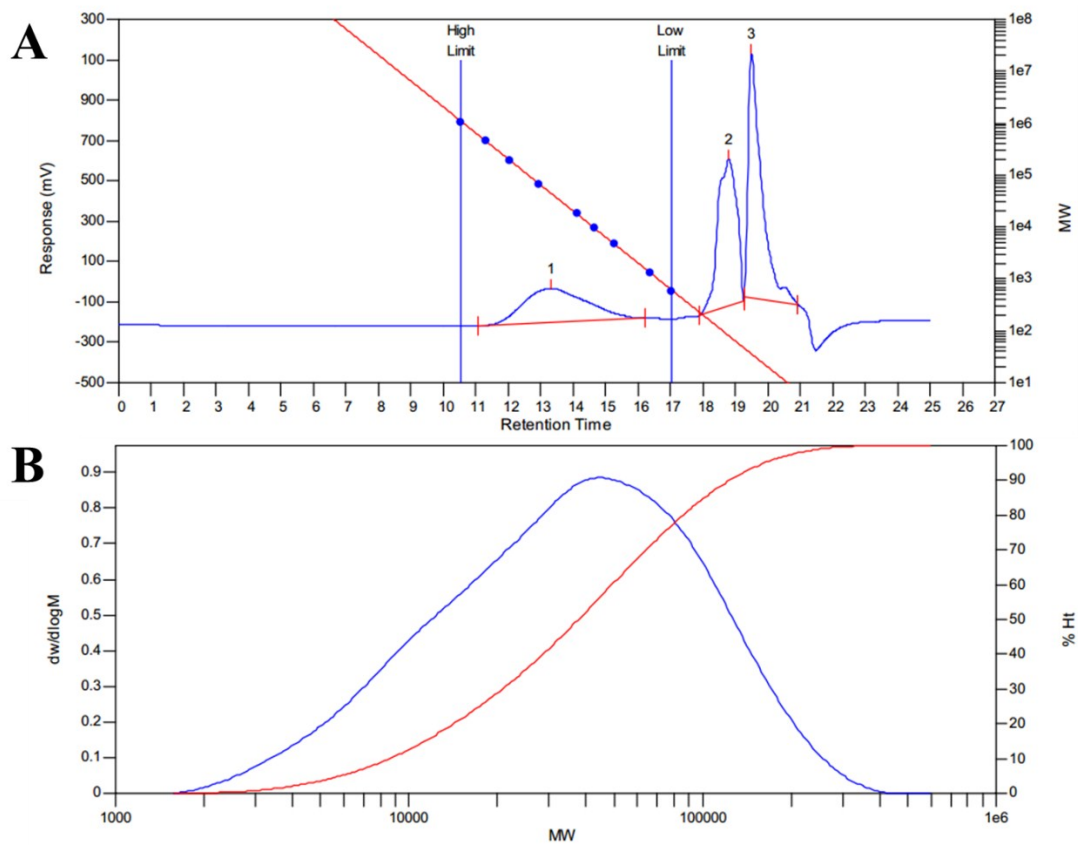

Fig. S3. (A) , (B) Gel permeation chromatography (GPC) curves of  $\text{Fe}_3\text{O}_4@PS$  microspheres. The concentration of  $\text{Fe}_3\text{O}_4$  nanoparticles is 300 mg/L (Fig. 3D).

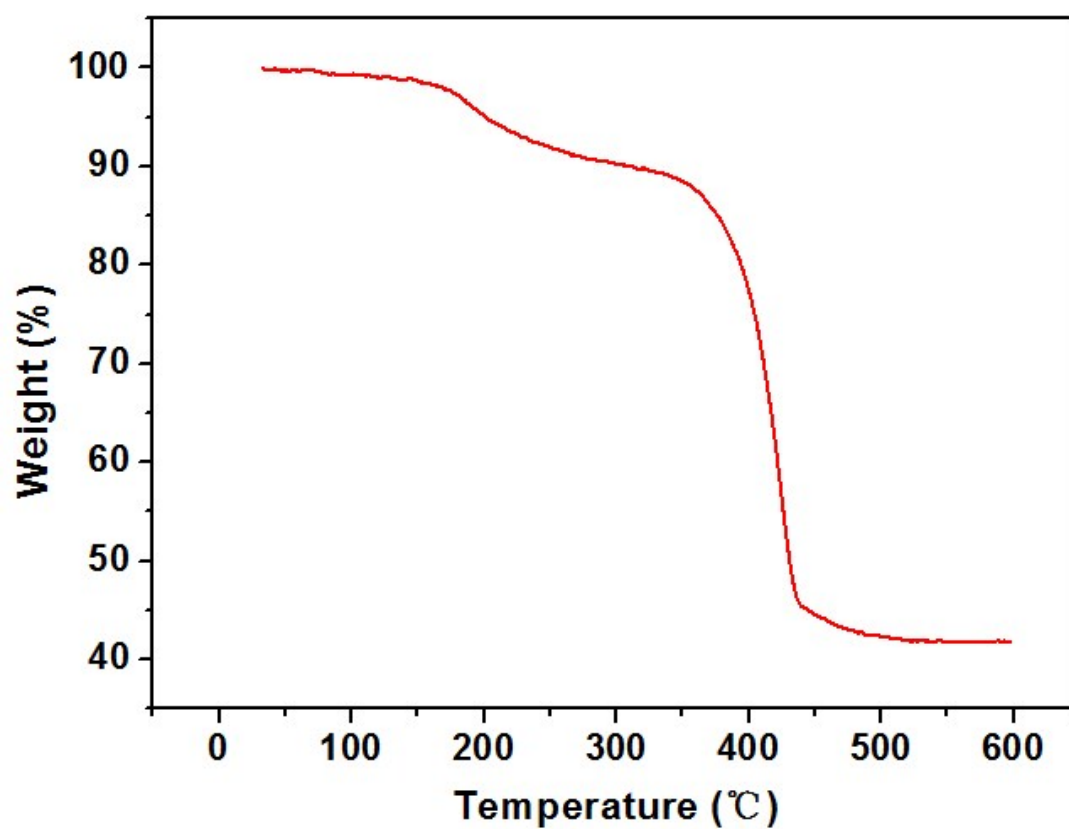

Fig. S4. TGA curve of Fe<sub>3</sub>O<sub>4</sub>@PS microspheres. The concentration of Fe<sub>3</sub>O<sub>4</sub> nanoparticles is 300 mg/L (Fig. 3D).
